# Supplementary material for: The effect of ammonolysis conditions on the structural properties and oxidation kinetics of cubic niobium oxynitride
Source: Royal Society of Chemistry journal article supplement (doi:10.1039/d3tc01068f), 2023-01-01
Supplement: d3tc01068f1.pdf [file d3tc01068f1.pdf]

**Electronic Supplementary Information (ESI) for:**

**The effect of ammonolysis conditions on the structural properties and the oxidation kinetics of cubic niobium oxynitride**

Vanessa C. D. Graça<sup>1,2\*</sup>, Laura I.V. Holz<sup>1,2</sup>, Francisco J. A. Loureiro<sup>1,2</sup>, Glenn C. Mather<sup>3</sup>, Duncan P. Fagg<sup>1,2,\*\*</sup>

<sup>1</sup> TEMA - Centre for Mechanical Technology and Automation, Department of Mechanical Engineering, University of Aveiro, 3810-193 Aveiro, Portugal.

<sup>2</sup> LASI - Intelligent Systems Associate Laboratory, Portugal.

<sup>3</sup> CSIC - Instituto de Ceramica y Vidrio (ICV), Madrid, Spain

**Determination of N and O content**

The N content was obtained from an average of three samples produced at each condition. The nitrogen content was calculated by elemental analysis using standard combustion analysis (Truspec 630-200-200) detected by use of a thermal conductivity detector. The oxygen content was determined by thermogravimetry/differential thermal analysis (TGA/DSC; Model STA449/6/G, Netzsch, Jupiter, Germany), by fully oxidizing samples in pure oxygen (O<sub>2</sub>) at 1000 °C, to Nb<sub>2</sub>O<sub>5</sub>, which was confirmed by performing a subsequent XRD analysis on the resultant powder. Figure S1 shows an example of the obtained TGA profile.

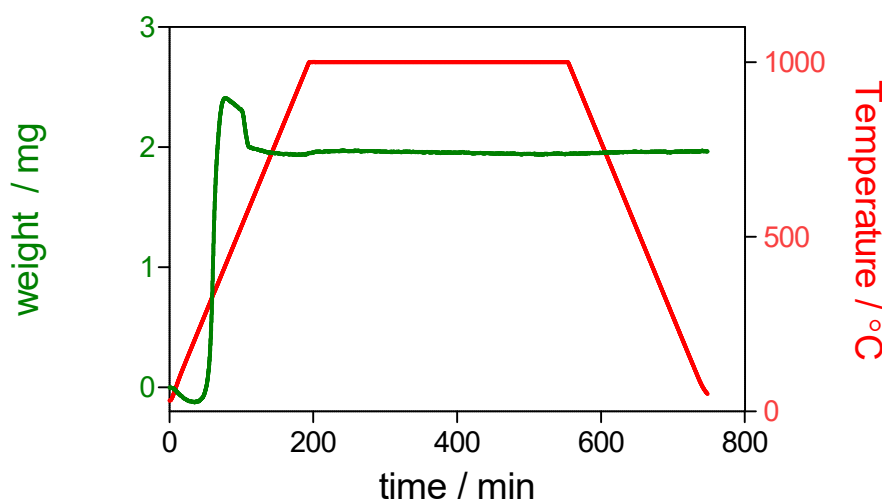

Fig. S1 – TGA profile of the NbN<sub>1.02</sub>O<sub>0.66</sub> sample synthesized at 800 °C for 1 h.

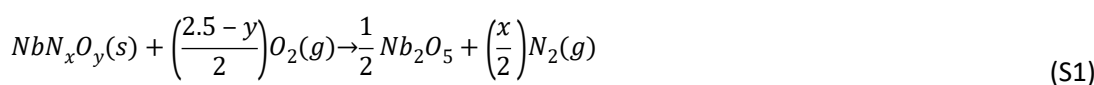

The number of mols of NbN<sub>x</sub>O<sub>y</sub> of the sample measured by elemental analysis (<sup>n</sup><sub>NbN<sub>x</sub>O<sub>y</sub></sub><sup>e.a.</sup>) was determined by the following expression:

$$n_{NbN_xO_y,e.a.} = (n_{Nb_2O_5} \times 2) \left( \frac{m_{initial,e.a.}}{m_{initial,TGA}} \right), \quad \text{where} \quad n_{Nb_2O_5} = \frac{m_{final,TGA}}{M_{Nb_2O_5}} \quad (S2)$$

where  $m_{initial,e.a.}$  is the initial mass of  $NbN_xO_y$  used in the elemental analysis,  $m_{initial,TGA}$  is the initial mass of  $NbN_xO_y$  used in TGA analysis,  $m_{final,TGA}$  is the final mass of TGA analysis and  $M_{Nb_2O_5}$  is the molar mass of  $Nb_2O_5$ .

The molar mass of  $NbN_xO_y$  ( $M_{NbN_xO_y}$ ) was therefore calculated according to the subsequent expression:

$$M_{NbN_xO_y} = \frac{m_{initial,e.a.}}{n_{NbN_xO_y,e.a.}} \quad (S3)$$

The nitrogen and oxygen contents,  $x$  and  $y$ , respectively, were then calculated as follows:

$$x = \frac{\left[ \text{weight \% N} \times \left( \frac{m_{initial,e.a.}}{n_{NbN_xO_y,e.a.}} \right) \right]}{14} \quad (S4)$$

$$y = \frac{(M_{NbN_xO_y} - M_{Nb} - 14x)}{16} \quad (S5)$$

where  $M_{Nb}$  is the molar mass of Nb.
